# Supplementary material
Source: PubMed Central journal article supplement (PMC4136625)
Supplement: 1410579111_pnas.201410579SI.pdf [file 1410579111_pnas.201410579SI.pdf]

# Supporting Information

Engler et al. 10.1073/pnas.1410579111

## SI Materials and Methods

**Lung Single Cell Preparation, Flow Cytometry, and Th2 Cytokine ELISAs.** Lungs were dissected, enzymatically digested with 0.5 mg/mL collagenase type IA (Sigma-Aldrich) and pushed through a 70- $\mu$ m nylon cell strainer. The antibodies used for staining were anti-MHCII (clone M5/114.15.2), anti-B220 (RA3-6B2), anti-CD11c (clone HL3), anti-CD103 (clone M290), and anti-CD11b (clone M1/70; all BD Pharmingen). FACS analyses were performed on a FACSCanto2 cytometer (BD Biosciences); post-acquisition analysis was done using FlowJo software (Tree Star). Cytokines in lung single-cell cultures restimulated for 72 h with 250  $\mu$ g/mL ovalbumin were quantified by ELISA (IL-5, BD Pharmingen; IL-13, R&D Systems).

**Preparation of Murine and Human DCs and IL-10 ELISA.** For generation of murine bone-marrow-derived dendritic cells (BM-DCs), bone marrow isolated from the hind legs of donor mice (BL/6.TLR2<sup>-/-</sup>, BL/6.TLR4<sup>-/-</sup>, BL/6.MyD88<sup>-/-</sup> mice, all from Jackson Labs) was seeded at 50,000 cells per well in 96-well plates in RPMI/10% (vol/vol) FCS and 4 ng/mL GM-CSF and cultured for 5 d. For the isolation of MLN-DCs, mesenteric lymph nodes were digested in 1 mg/mL collagenase (Sigma-Aldrich) for 30 min at 37 °C with shaking before filtering through a cell strainer (40  $\mu$ m; BD Biosciences) and immunomagnetic isolation of DCs using mouse-specific CD11c microbeads (Miltenyi Biotec). BM-DCs and MLN-DCs were stimulated with the indicated amounts of *Helicobacter pylori* PMSS1 extract for 16 h, and supernatants were subjected to mIL-10 ELISA (BD Pharmingen). Human monocyte-derived dendritic cells were generated from peripheral blood mononuclear cells. Venous blood was drawn from six healthy volunteers according to protocols approved by the Institutional Review Board of Leiden University Medical Center. Cells were collected after density gradient centrifugation on Ficoll, and CD14<sup>+</sup> monocytes were positively isolated by magnetic-activated cell sorting (MACS) using CD14 microbeads (Miltenyi

Biotec). Cells were cultured in RPMI-1640 (Invitrogen) supplemented with penicillin (100 U/mL, Astellas Pharma), streptomycin (100  $\mu$ g/mL, Sigma), pyruvate (1 mM, Sigma), glutamate (2 mM, Sigma), 10% FCS, 20 ng/mL human recombinant granulocyte-macrophage colony-stimulating factor (rGM-CSF, Invitrogen/Life Technologies), and 0.86 ng/mL human rIL-4 (R&D Systems) for 6 d. On day 3, the medium and the supplements were refreshed. Monocyte-derived DCs were stimulated with *H. pylori* extract for 48 h. Secretion of IL-10 by the DCs in the supernatant was measured by ELISA (Sanquin).

**DC/T-Cell Cocultures.** For Treg differentiation ex vivo, BM-DC cultures were infected overnight with wild-type *H. pylori* PMSS1 or treated with 25  $\mu$ g/mL *H. pylori* extract. Bacteria were killed with 200 U penicillin/0.2 mg streptomycin/mL for 6 h before the addition of T cells. CD4<sup>+</sup>CD25<sup>-</sup> T cells were prepared from single-cell suspensions of naive C57BL/6 spleens by immunomagnetic sorting (R&D Systems). DCs were cocultured with CD4<sup>+</sup>CD25<sup>-</sup> T cells at a ratio of 1:2 ( $0.5 \times 10^5$  DC to  $1 \times 10^5$  T cells) in RPMI containing 10% FCS, 10 ng/mL rTGF- $\beta$  (PeproTech), 10 ng/mL rIL-2 (R&D Systems) and 1  $\mu$ g/mL anti-CD3 $\epsilon$  (BD Bioscience). After 72 h of coculture, the cells were stained first for CD4 and CD25 and then, after fixation and permeabilization, for FoxP3 (FoxP3-APC, eBioscience). The percentage of FoxP3<sup>+</sup> CD4<sup>+</sup> T cells was assessed by FACS on a Cyan ADP 9 instrument (Beckman Coulter) and analyzed using FlowJo software (TreeStar).

**Processing of Gastric Tissue for Plating and Colony Counting.** Stomachs were retrieved and dissected longitudinally. For the quantitative assessment of *H. pylori* colonization, a stomach section containing representative amounts of antral and corpus tissue was homogenized in *Brucella* broth and serial dilutions were plated on horse blood plates for colony counting as described (1).

1. Arnold IC, et al. (2011) Tolerance rather than immunity protects from *Helicobacter pylori*-induced gastric preneoplasia. *Gastroenterology* 140(1):199–209.



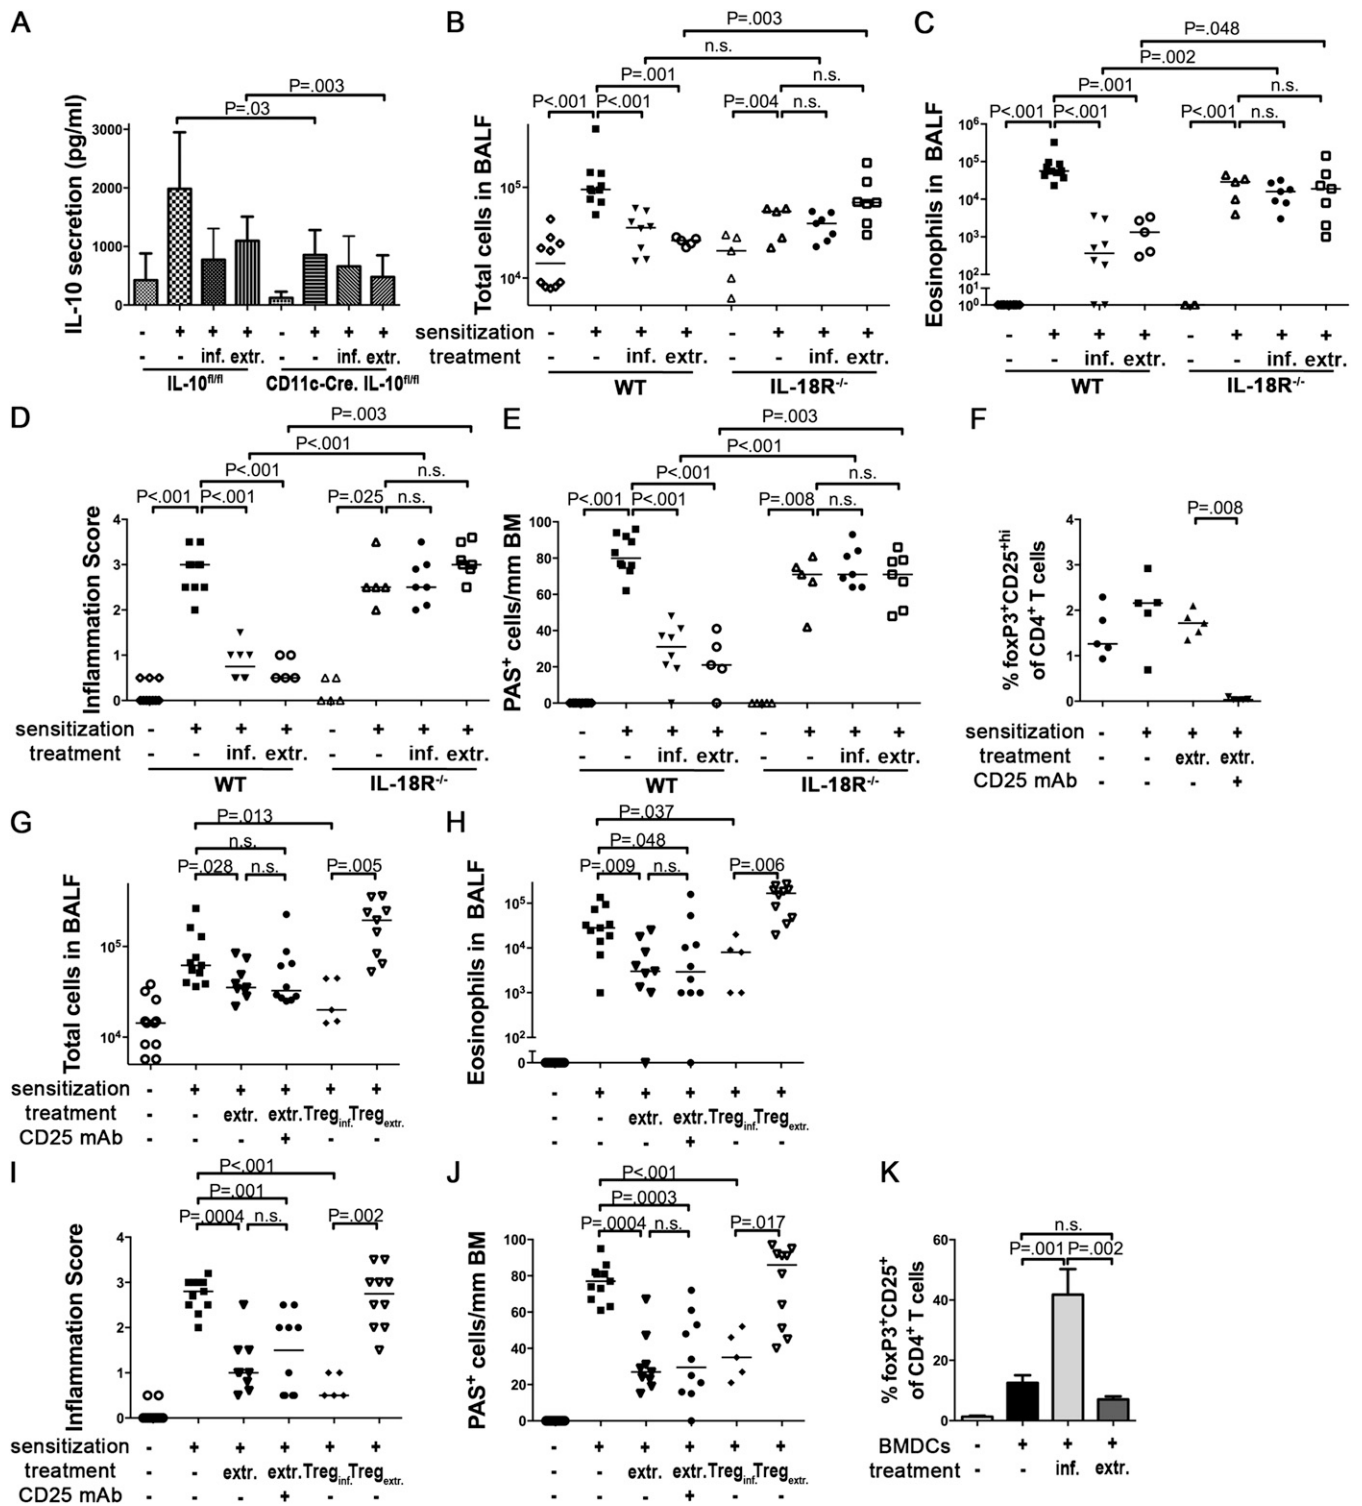

**Fig. 52.** The protection against asthma conferred by *H. pylori* depends on IL-10 and IL-18, but not on regulatory T cells. (A) CD11c-Cre.*IL-10<sup>fl/fl</sup>* mice and their *IL-10<sup>fl/fl</sup>* littermates were treated with *H. pylori* extract before being subjected to ovalbumin sensitization and challenge as described in Fig. 2 G–J. IL-10 secretion by single cell lung preparations restimulated with ovalbumin, as assessed by ELISA. (B–E) WT C57BL/6 and *IL-18R<sup>-/-</sup>* mice were neonatally infected with *H. pylori* or treated with *H. pylori* extract before being subjected to ovalbumin sensitization and challenge as described in Fig. 1. (B and C) Total cells and eosinophils contained in 1 mL of BALF. (D and E) Tissue inflammation and goblet cell metaplasia. (F–J) Wild-type C57BL/6 mice were treated with *H. pylori* extract before being subjected to ovalbumin sensitization and challenge. One group received two doses of anti-CD25 antibody during ovalbumin challenge. Additional sensitized and challenged groups received 100,000 immunomagnetically isolated CD4<sup>+</sup>CD25<sup>+</sup> T cells from either neonatally infected donors or extract-treated donors i.v. 2 d before the first ovalbumin challenge. (F) Lung infiltration of CD4<sup>+</sup>CD25<sup>+</sup>FoxP3<sup>+</sup> T cells as assessed in lung single cell preparations of individual mice. (G and H) Total cells and eosinophils contained in 1 mL of BALF. (I and J) Tissue inflammation and goblet cell metaplasia. (K) BM-DCs were either infected overnight with live *H. pylori* or treated with 25 μg/mL *H. pylori* extract. Bacteria were killed with antibiotics before the addition of splenic CD4<sup>+</sup>CD25<sup>+</sup> T cells at a DC:T-cell ratio of 1:2. DC:T-cell cocultures were supplemented with rTGF-β, rIL-2 and anti-CD3ε. After 72 h of coculture, the cells were stained for CD4, CD25, and FoxP3 and the fraction of FoxP3<sup>+</sup> CD4<sup>+</sup> T cells was assessed by FACS.
